# Supplementary material for: Non-Melanoma Skin Cancer Mortality in Spain: A Predictive Model up to 2044
Source: MDPI journal article supplement (doi:10.3390/jcm10245750), 2021-12-08
Supplement: s1 [file s1]

### Supplementary Material-**R code**

```
# Reading package:
source("Nordpred.S")
options(scipen = 999)

# Reading data
indata <- read.table("data//varones_casos.txt",header =T,sep=";",row.names=1)
inpop1 <- read.table("data//varones_actual.txt",header =T,sep=";",row.names=1)
inpop2 <- read.table("data//varones_pred.txt",header =T,sep=";",row.names=1)

# Include possible population predictions
inpop <- cbind(inpop1, inpop2)

# Run predictions:
est <- nordpred.estimate(cases=indata, pyr=inpop, noperiod=5, startestage=7)
res <-
nordpred.prediction(est, startuseage=7, cuttrend=c(0, .25, .5, .75, .75), recent=T)

# Or with poisson link function (instead of the powerlink as used in the
nordpred predictions):
est2 <- nordpred.estimate(indata, inpop, 5, 7, linkfunc="poisson")
res2 <-
nordpred.prediction(est2, startuseage=7, cuttrend=c(0, .25, .5, .75, .75), recent=T)

# Get results:
print.nordpred(res)
nordpred.getpred(res)
summary(res, printpred=F)

# Get results with standardisation:
# World population
wstand <- c(0.12, 0.1, 0.09, 0.09, 0.08, 0.08, 0.06, 0.06, 0.06, 0.06, 0.05,
           0.04, 0.04, 0.03, 0.02, 0.01, 0.005, 0.005)

European population 2013
wstand2 <- c(0.05, 0.055, 0.055, 0.055, 0.06, 0.06, 0.065, 0.07, 0.07, 0.07,
            0.07, 0.065, 0.06, 0.055, 0.05, 0.04, 0.025, 0.025)

round(nordpred.getpred(res, incidence=T, standpop=NULL), 2)
round(nordpred.getpred(res, incidence=T, standpop=wstand), 2)
round(nordpred.getpred(res, incidence=T, standpop=wstand2), 2)

# Plot results:
plot(res, standpop=wstand)
```

```
# Plot results with power5 and poisson links:
```

```
plot(res2,standpop=wstand)
```

```
plot(res,new=T,lty=c(1,2),standpop=wstand)
```

```
#plot Pob estandar europea
```

```
plot(res,standpop=wstand2)
```

```
plot(res2,standpop=wstand2)
```

```
plot(res,new=T,lty=c(1,2),standpop=wstand2)
```

```
plot(nordpred.prediction(est,startuseage=7,cuttrend=c(0,.25,.5,.75,.75),recent  
=T),standpop=wstand,new=T,lty=c(1,4))
```

```
plot(nordpred.prediction(est,startuseage=7,cuttrend=c(0,.25,.5,.75,.75),recent  
=T),standpop=wstand2,new=T,lty=c(1,4))
```
